# Supplementary figures and images for: Excitation-Inhibition Imbalance Underlies Perioperative Neurocognitive Disorders: A Single-Nucleus Transcriptomic Perspective in Mice Hippocampus
Source: Research Square preprint supplement (doi:10.21203/rs.3.rs-7067489/v1), 2025-07-27

A

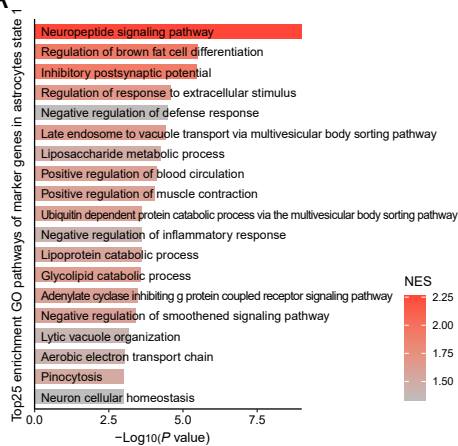

B

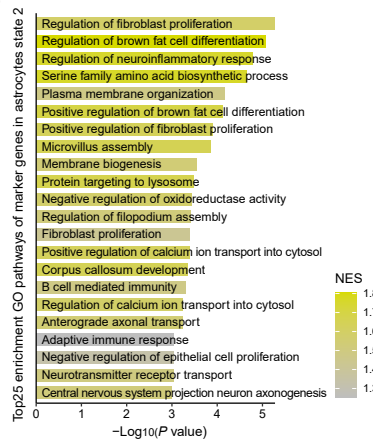

C

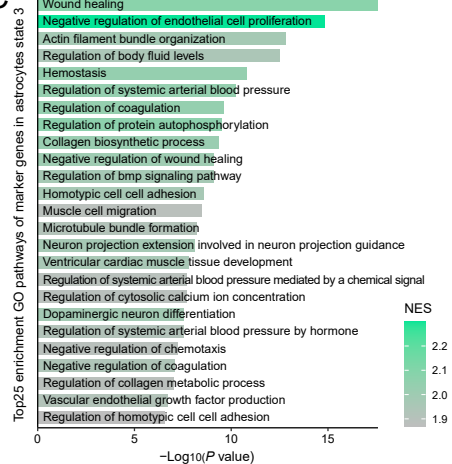

D

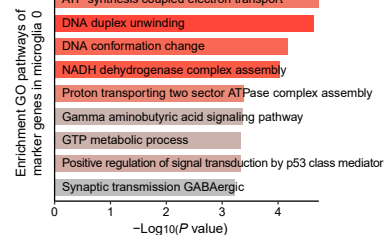

E

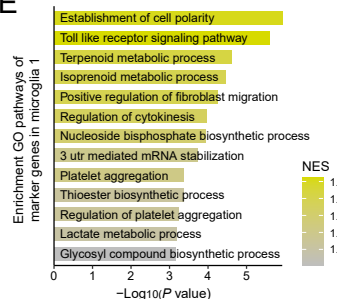

F

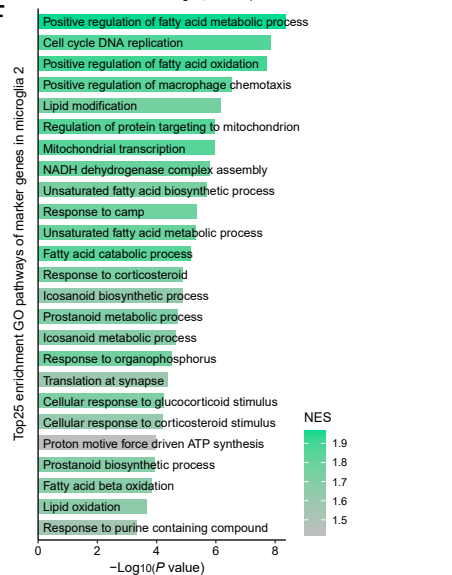

G

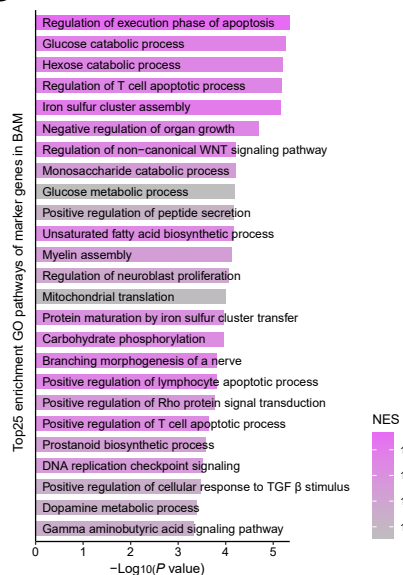

H

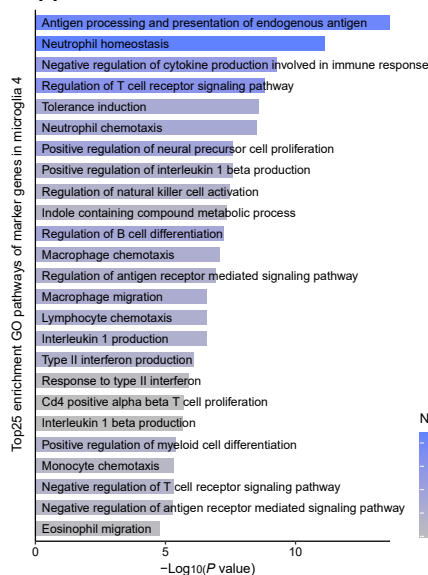

I

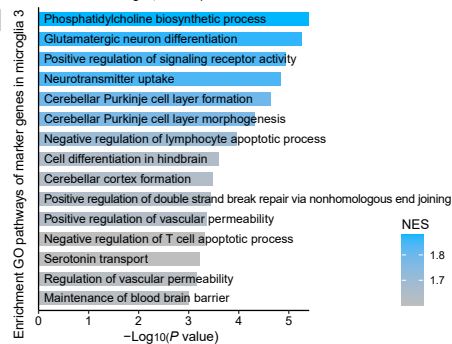

Supplement: Supplementary file 1 [file a67f9f43f7ab0f14e0faa3ce.pdf]
